# Supplementary material
Source: PubMed Central journal article supplement (PMC3625454)
Supplement: NIHMS420799-supplement-Supp_FigureS1-S2_TableS1.pdf [file NIHMS420799-supplement-Supp_FigureS1-S2_TableS1.pdf]

## **SUPPLEMENTAL FIGURES**

### **Supplemental Figure 1. Fluorescence-activating cell sorting and monocyte functional assays.**

A) Shows an example of bone marrow monocyte progenitors isolated by FACS to an initial purity of approximately 97%. A second sort was necessary to reach 100% purity. Single cell sorting of populations PIV, PV and PVI were performed to test the differentiation and functionality of macrophages, dendritic cells and osteoclasts. B) Peripheral monocytes were purified using the same approach shown in A). The FACS dot plots shown are of peripheral blood monocytes. Single cell sorting for both spleen and peripheral blood monocytes was performed only to test the ability of these cells to differentiate to macrophages, dendritic cells and osteoclasts, functional assays required a higher number of cells.

### **Supplemental Figure 2. Single cell sorting of peripheral tissue monocyte progenitors.**

A) Spleen or B) peripheral blood monocyte progenitors were single cell sorted by FACS to a density of 1, 5, 50 or 100 cells per well, and tested for their ability to differentiate to macrophages, dendritic cells and osteoclasts. Single cell sorts of 1, 5, 50 or 100 cells per well of spleen monocytes were cultured for 13 days with M-CSF for macrophages (left bar graph), 13 days with M-CSF and 7 additional days with both M-CSF and RANKL for osteoclasts (middle bar graph) or 13 days with GM-CSF and 7 additional days with both GM-CSF and IL-4 for dendritic cells (right graph). For peripheral blood monocytes, single cell sorts of 1, 5, 50 or 100 cells per well were cultured for 15 days with M-CSF for macrophages (left bar graph), 15 days with M-CSF and 5 additional days with both M-CSF and RANKL for osteoclasts (middle bar graph) or 14 days with GM-CSF and 6 additional days with both GM-CSF and IL-4 for dendritic cells (right graph).

### **Supplemental Table 1. Phenotypic comparison of bone marrow and peripheral tissue monocyte progenitors.**

Comparison of cell surface markers expression of freshly isolated monocyte progenitors derived from bone marrow, spleen or peripheral blood. Differences found among progenitors are highlighted.

# Supplemental Figure 1.

## A Bone Marrow Monocyte Progenitor

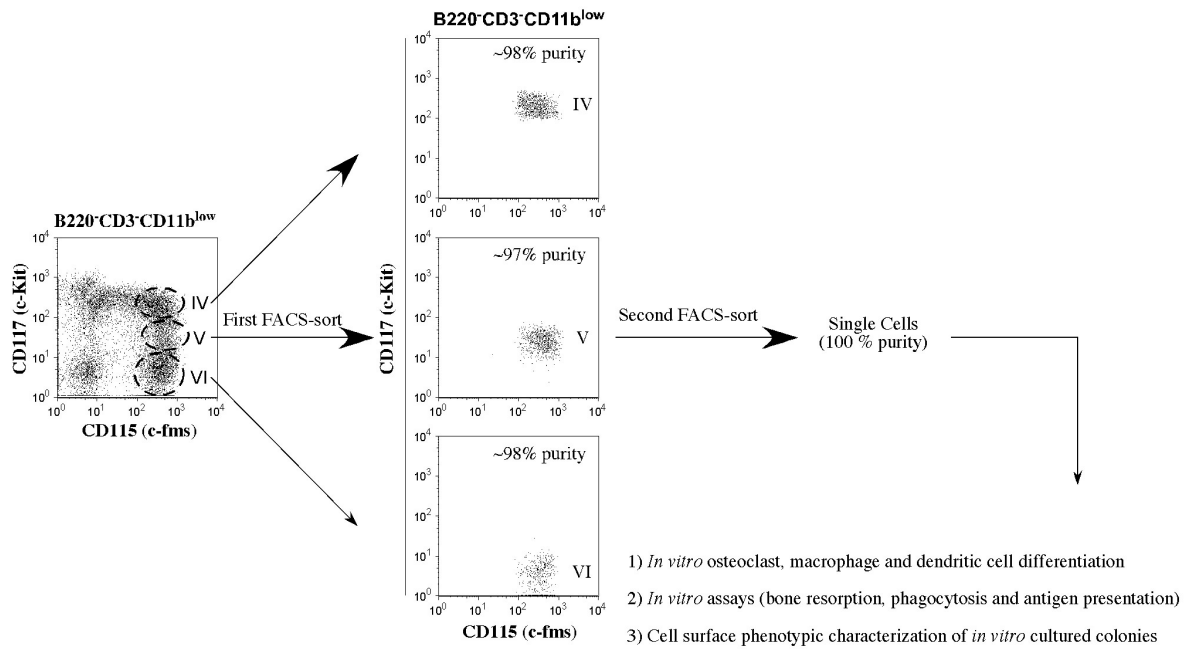

## B Spleen or Peripheral Blood Monocyte Progenitor

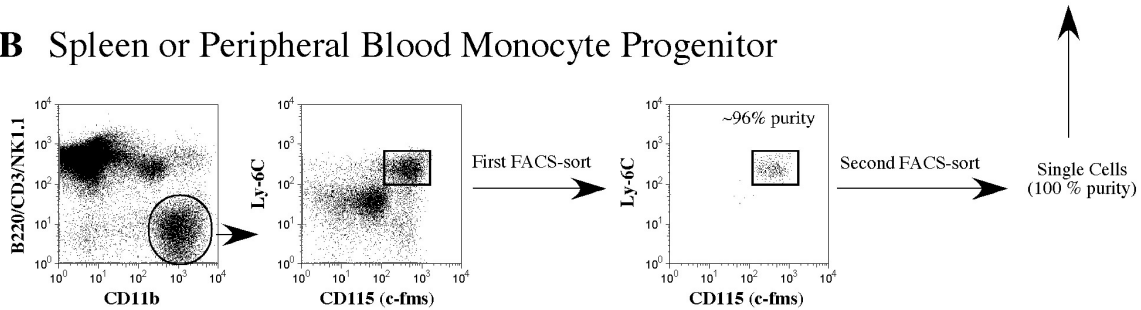

## Supplemental Figure 2.

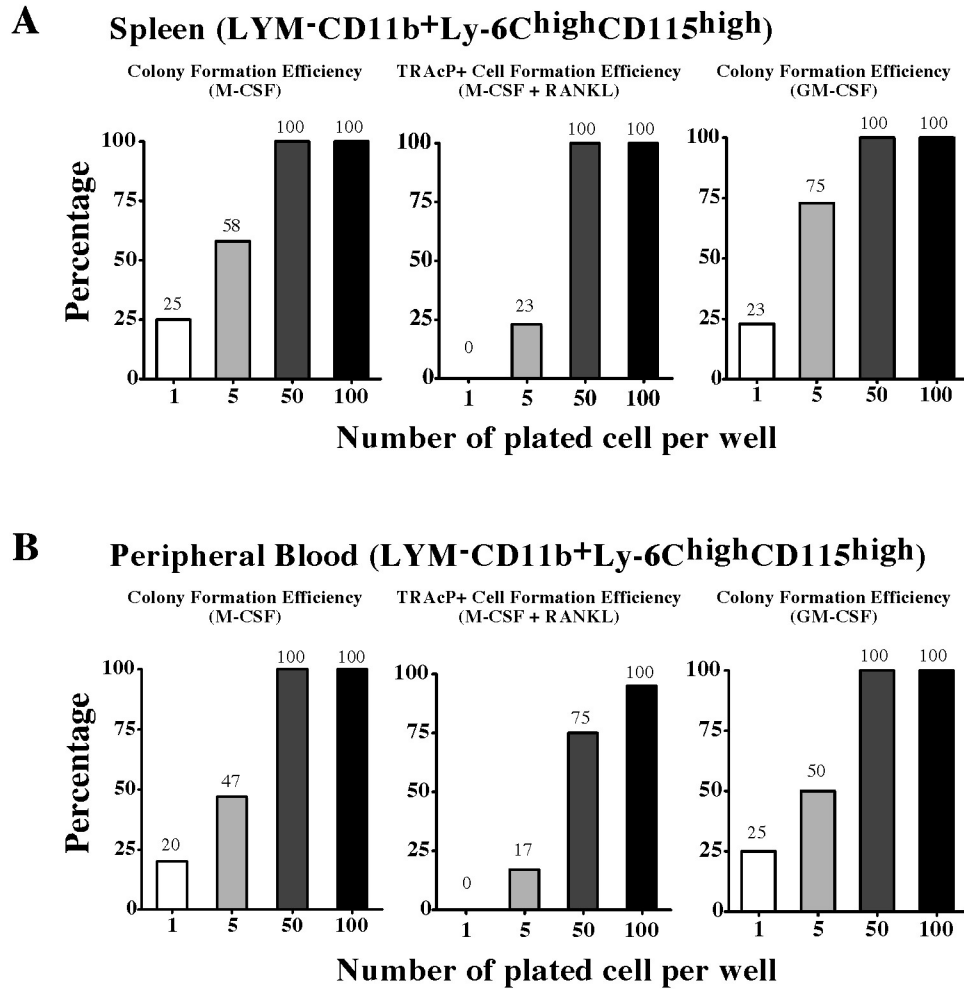

## Supplemental Table 1.

|               | <b>BM (PIV)</b> | <b>Spleen</b> | <b>PBL</b> |
|---------------|-----------------|---------------|------------|
| <b>B220</b>   | (-)             | (-)           | (-)        |
| <b>CD3</b>    | (-)             | (-)           | (-)        |
| <b>NK1.1</b>  | (-)             | (-)           | (-)        |
| <b>CD11b</b>  | low             | high          | high       |
| <b>Ly-6C</b>  | high            | high          | high       |
| <b>Ly-6G</b>  | (-)             | (-)           | (-)        |
| <b>CD115</b>  | high            | high          | high       |
| <b>CD117</b>  | high            | low           | low        |
| <b>CD11c</b>  | low             | low/high      | low        |
| <b>F4/80</b>  | (+)             | (+)           | (+)        |
| <b>CD14</b>   | (+)             | (+)           | (+)        |
| <b>TLR4</b>   | (+)             | (+)           | (+)        |
| <b>CX3CR1</b> | low             | low           | low        |
| <b>CD62L</b>  | low             | low           | low        |
| <b>CCR2</b>   | low             | high          | high       |
| <b>MHCI</b>   | (+)             | (+)           | (+)        |
| <b>MHCII</b>  | low             | low           | low        |
| <b>CD40</b>   | low             | low           | (-)        |
| <b>CD80</b>   | low             | high          | low        |
| <b>CD86</b>   | low             | low           | low        |

Bone marrow monocyte: **B220<sup>-</sup>CD3<sup>-</sup>CD11b<sup>lo</sup>CD117<sup>high</sup>CD115<sup>high</sup>**

Spleen monocyte: **LYM<sup>-</sup>CD11b<sup>high</sup>Ly-6C<sup>high</sup>CD115<sup>high</sup>**

Peripheral blood monocyte: **LYM<sup>-</sup>CD11b<sup>high</sup>Ly-6C<sup>high</sup>CD115<sup>high</sup>**
